# Supplementary material for: Fluorinated imine modulating efficient sulfur redox kinetics and a stable solid electrolyte interphase in lithium–sulfur batteries
Source: Royal Society of Chemistry journal article supplement (doi:10.1039/d4ta08542f), 2025-01-01
Supplement: d4ta08542f1.pdf [file d4ta08542f1.pdf]

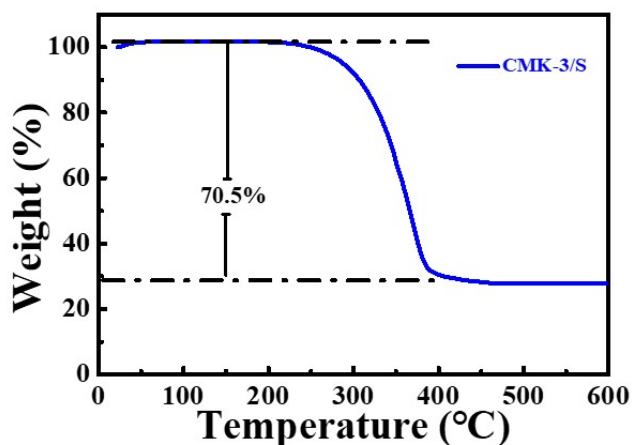

Fig. S1 TG curve of CMK-3/S composite material.

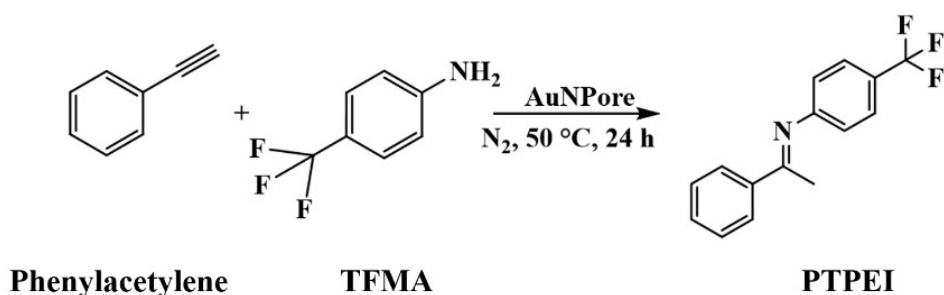

Fig. S2 Synthesis of PTPEI by hydroamination of TFMA.

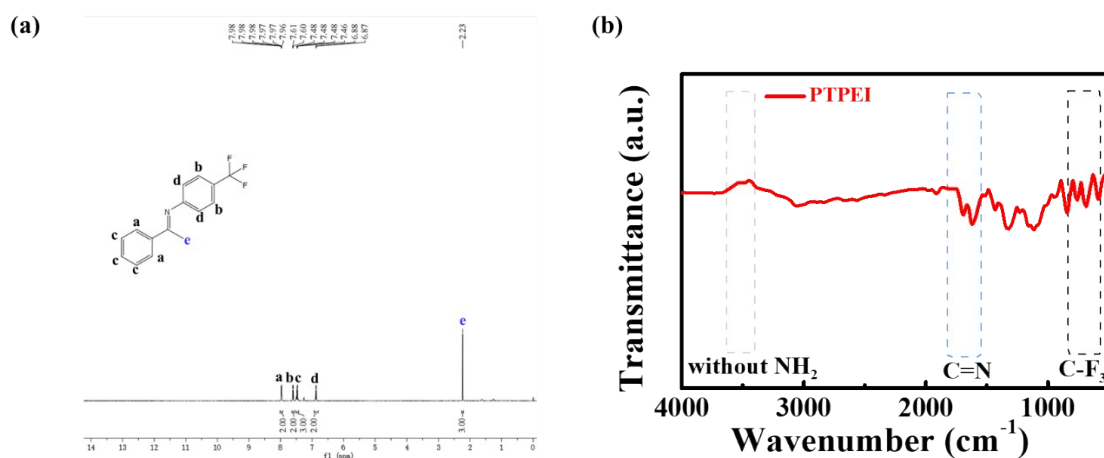

Fig. S3 (a) <sup>1</sup>H NMR spectra of the prepared PTPEI. (b) FTIR spectra of the prepared PTPEI.

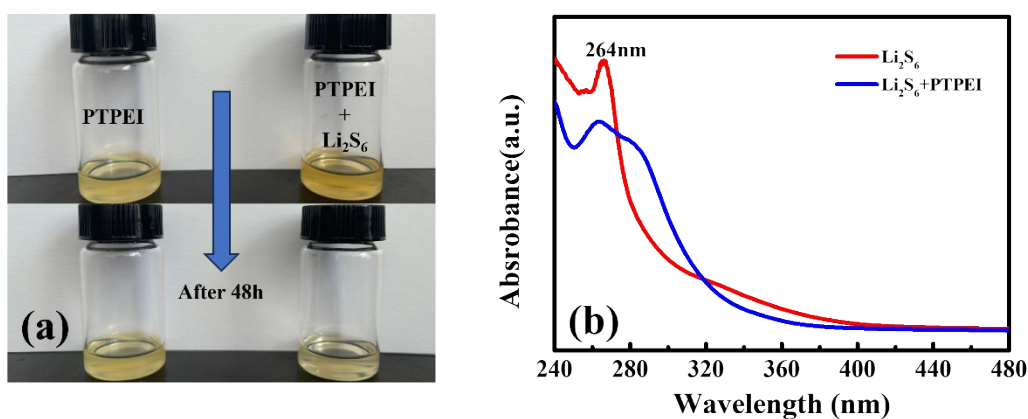

**Fig. S4** (a) Visual reaction phenomenon between  $\text{Li}_2\text{S}_6$  and PTPEI. (b) UV-visible spectra.

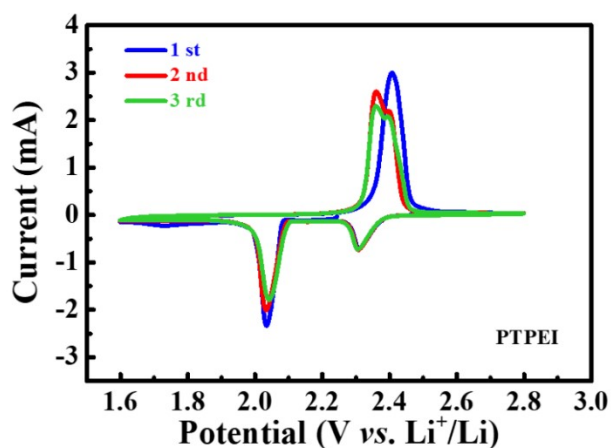

**Fig. S5** First three cyclic voltammograms (CV) for the cell with PTPEI recorded at scan rate of  $0.1 \text{ mV s}^{-1}$  from 1.6 to 2.8 V.

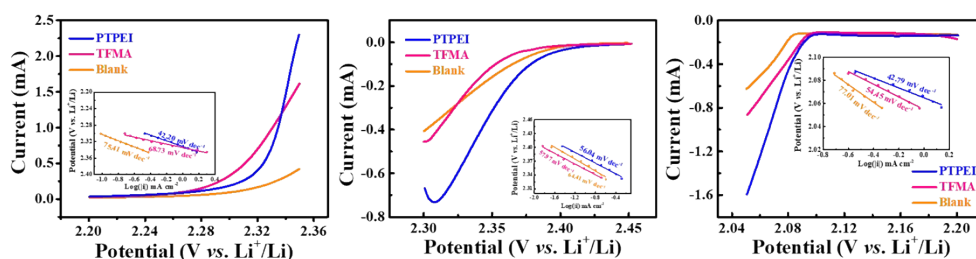

**Fig. S6** CV profiles of various additives at a scan rate of  $0.1 \text{ mV s}^{-1}$  and Tafel plots.

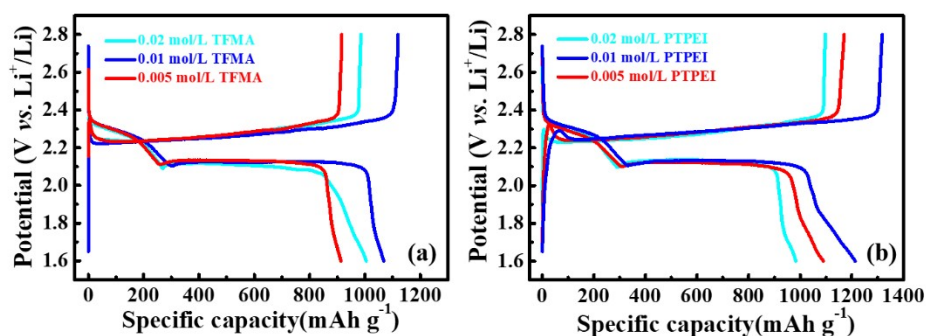

**Fig. S7** Initial galvanostatic charge-discharge curves of the cells with different concentrations of (a) TFMA and (b) PTPEI at 0.1C.

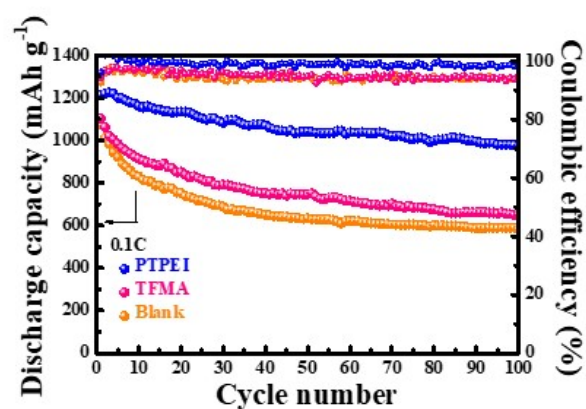

**Fig. S8** Cycling of the cell with PTPEI, with TFMA, and with Blank at 0.1C for 100 cycles.

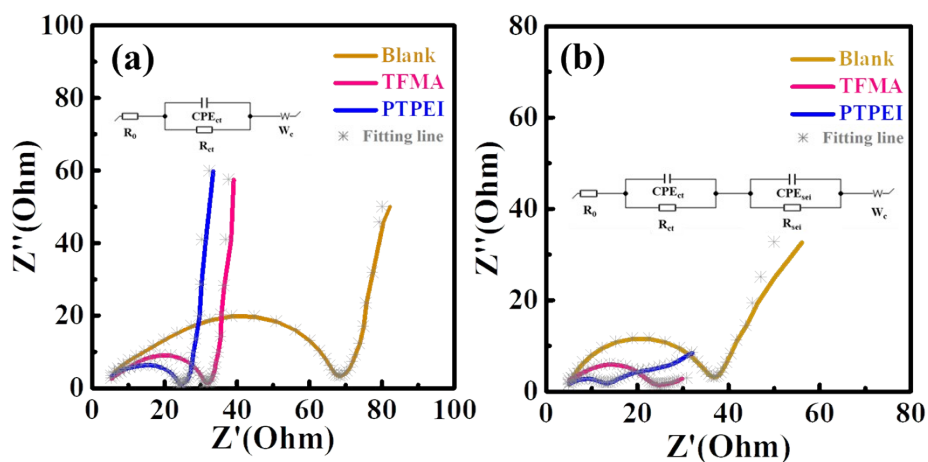

**Fig. S9** Nyquist plots of the (a) pristine and (b) after 100 cycles cell with Blank, with TFMA, and with PTPEI at 0.1C.

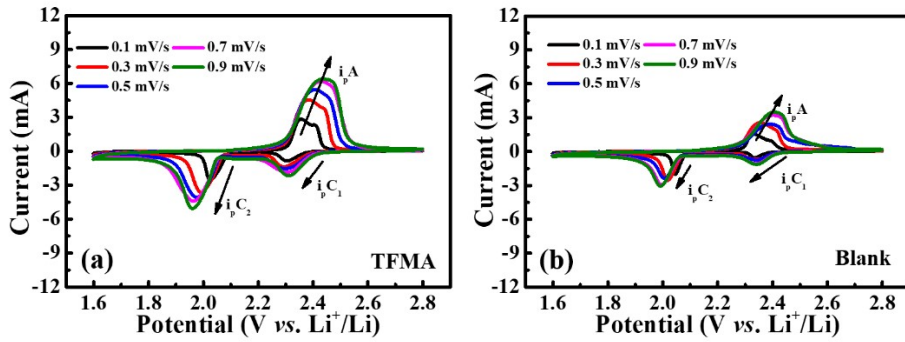

Fig. S10 CV curves of the cell (a) with TFMA and (b) with Blank at different scanning rate from 0.1 to 0.9  $\text{mV s}^{-1}$ .

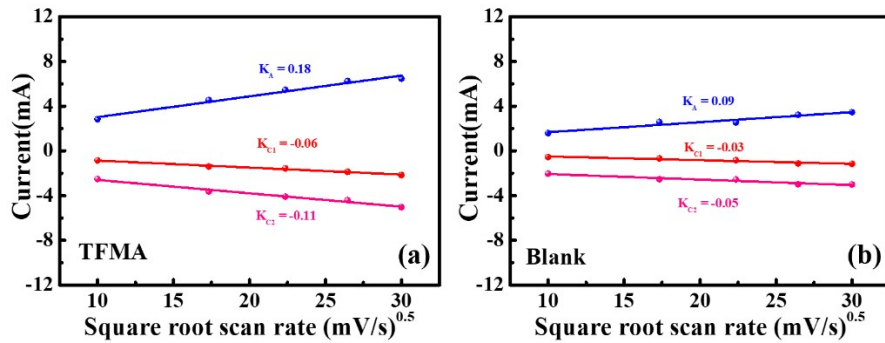

Fig. S11 Plot of  $\text{Li}^+$  ion diffusion kinetics for cell (a) with TFMA and (b) with Blank.

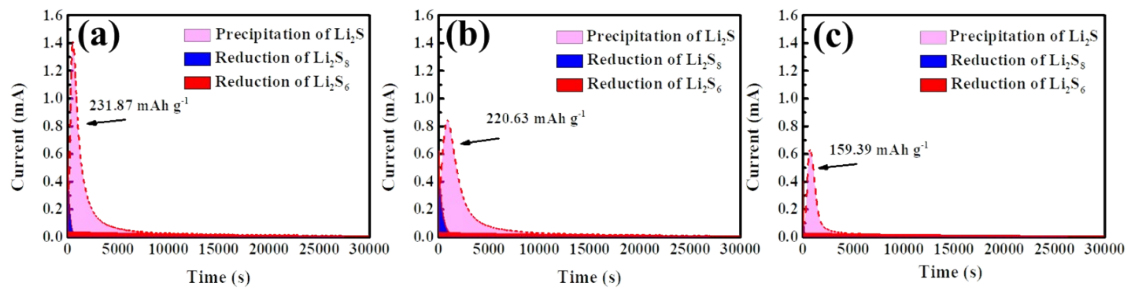

Fig. S12 Potentiostatic discharge profiles of  $\text{Li}_2\text{S}$  deposition (a) with PTPEI (b) with TFMA and (c) with Blank.

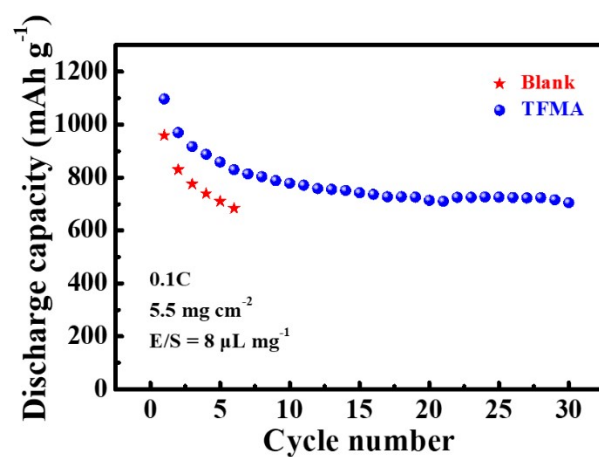

**Fig. S13** Cycling of the cell with Blank and with TFMA at a high sulfur loading ( $5.5 \text{ mg cm}^{-2}$ ) and a low E/S ratio ( $8 \text{ } \mu\text{L mg}^{-1}$ ) at 0.1C.

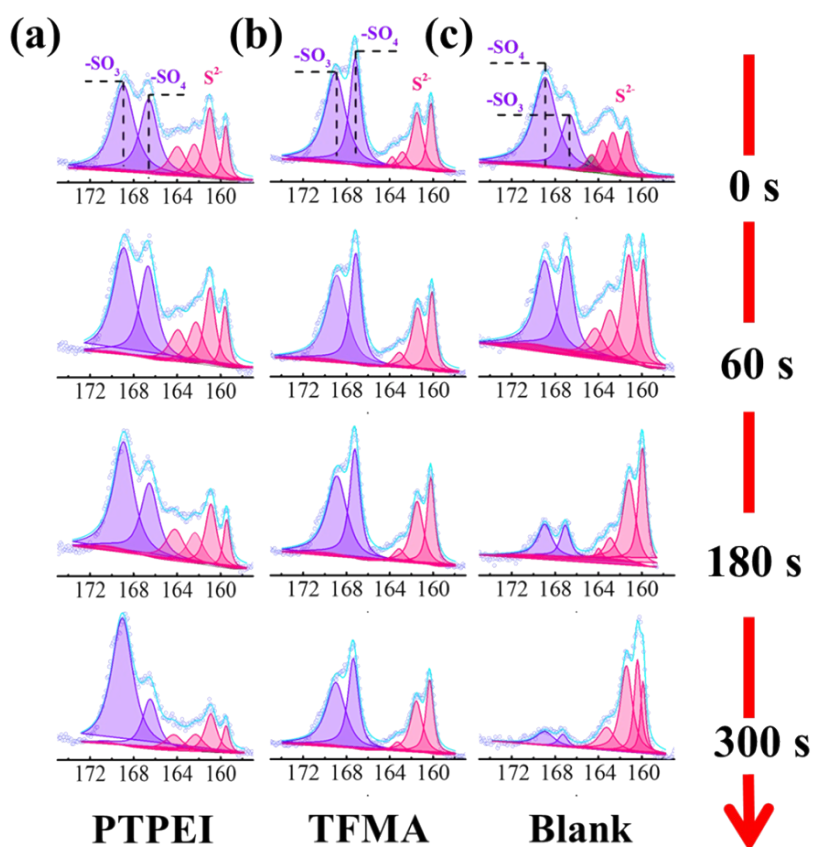

**Fig. S14** XPS spectra with different depth etch on the surface of Li-anode for Li-S cells after 100 cycles at 0.1C. S 2p spectra corresponding to the cell (a) with PTPEI, (b) with TFMA, and (c) with Blank.

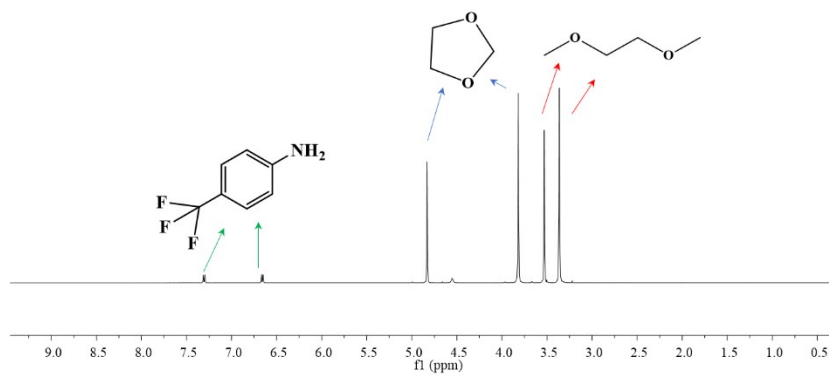

**Fig. S15**  $^1\text{H}$  NMR spectra of the SEI from the cell with TFMA after 100 cycles.

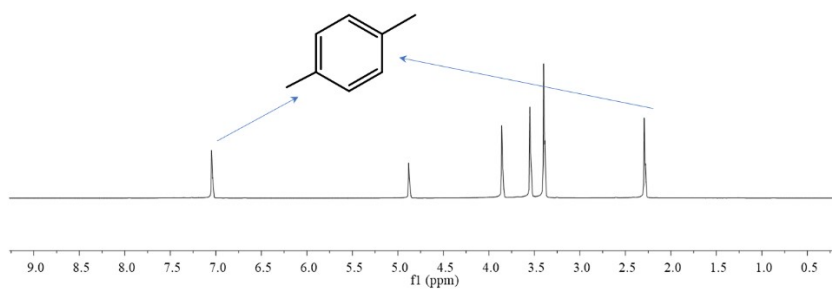

**Fig. S16**  $^1\text{H}$  NMR spectra of the SEI from the cell with PTPEI after 100 cycles.

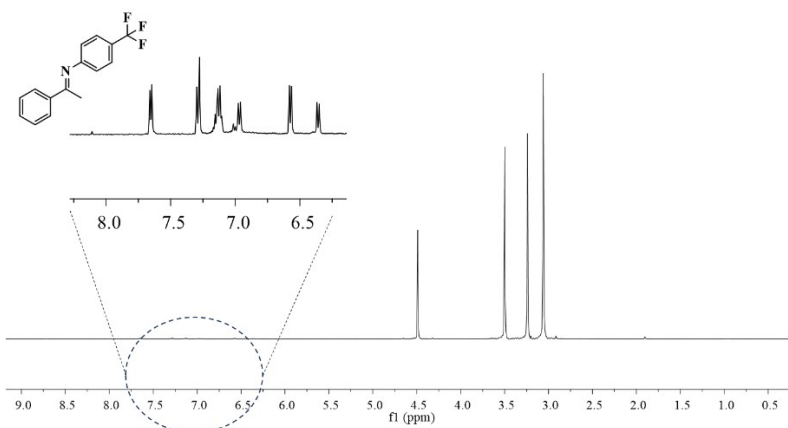

**Fig. S17**  $^1\text{H}$  NMR spectra of the electrolyte from the cell with PTPEI after 100 cycles.



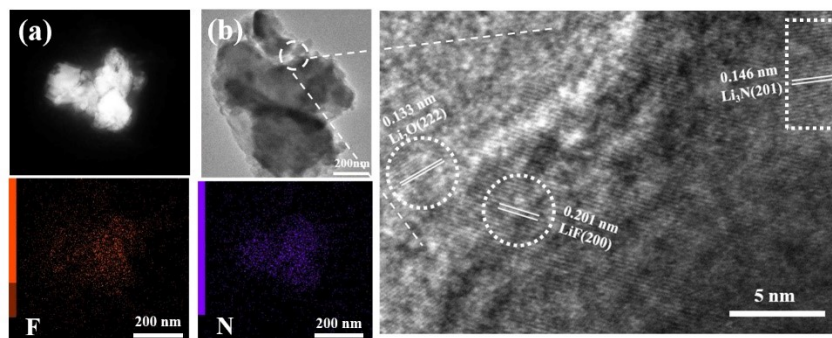

**Fig. S18** TEM, HRTEM, and elemental mapping images of the SEI from the cell with PTPEI.

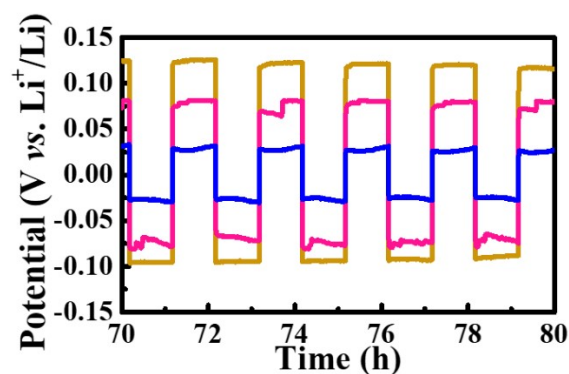

**Fig. S19** The voltage profiles of Li || Li symmetric cells with PTPEI, with TFMA, and with Blank at a current density of  $1 \text{ mA cm}^{-2}$  from 70 to 80 h.

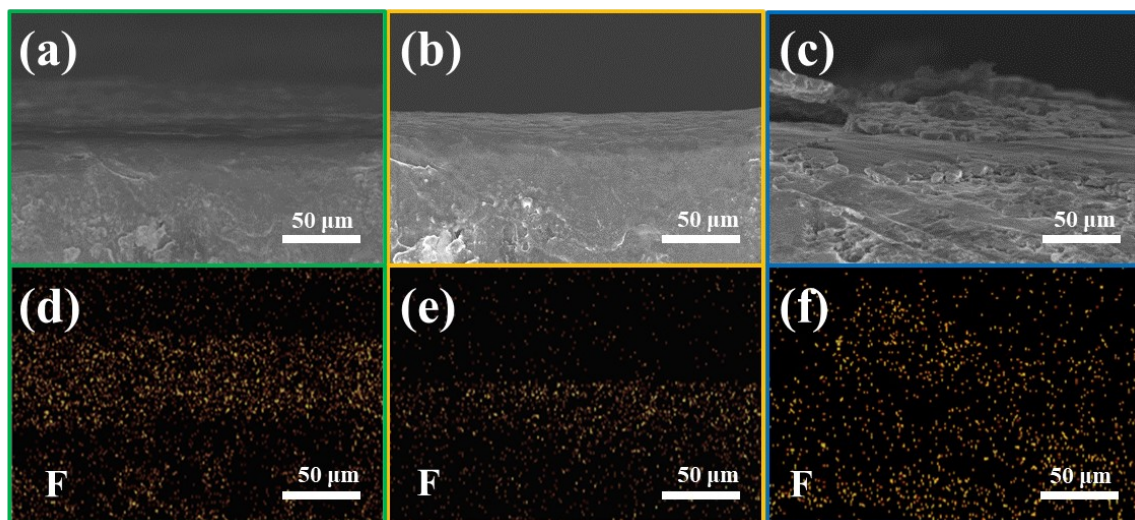

**Fig. S20** SEM images of (a-c) cross-section, and (d-f) EDS elemental mapping profiles for the Li-metals from Li || Li symmetric cells with PTPEI, cell with TFMA, and cell with Blank after 20 h, respectively.

**Table. S1** The data of the equivalent circuit fitting analysis.

| Additives                   | Pristine              |                       |                       | After 100 cycles      |                       |                       |
|-----------------------------|-----------------------|-----------------------|-----------------------|-----------------------|-----------------------|-----------------------|
|                             | PTPEI                 | TFMA                  | Blank                 | PTPEI                 | TFMA                  | Blank                 |
| $R_0(\Omega)$               | 5.35                  | 5.40                  | 6.13                  | 5.03                  | 5.06                  | 5.08                  |
| $R_{ct}(\Omega)$            | 18.63                 | 26.69                 | 62.14                 | 11.18                 | 18.85                 | 30.82                 |
| $CPE_{ct}$                  | $2.02 \times 10^{-6}$ | $1.74 \times 10^{-6}$ | $1.53 \times 10^{-6}$ | $7.12 \times 10^{-6}$ | $6.53 \times 10^{-6}$ | $5.27 \times 10^{-6}$ |
| $R_{sei}(\Omega)$           | -                     | -                     | -                     | 3.03                  | 5.07                  | 9.23                  |
| $CPE_{sei}$                 | -                     | -                     | -                     | $5.34 \times 10^{-5}$ | $4.11 \times 10^{-5}$ | $3.31 \times 10^{-5}$ |
| $\sigma_w(\Omega s^{-1/2})$ | 19.94                 | 24.03                 | 31.17                 | 12.76                 | 19.11                 | 25.23                 |

$R_0$  represents the ohmic resistance of the battery, including the electrolyte and electrodes.  $R_{sei}$  and  $CPE_{sei}$  are the resistance and constant phase element (CPE) associated with the passive layer, respectively.  $R_{ct}$  and  $CPE_{ct}$  are related to charge transfer.  $\sigma_w$  is the Warburg contribution taken at the infinite limit.



**Table. S2** The specific data related to the calculation of  $D_{(Li^+)}$  for the studied systems.

| Element | A     |                       | C <sub>1</sub> |                       | C <sub>2</sub> |                       |
|---------|-------|-----------------------|----------------|-----------------------|----------------|-----------------------|
|         | Slope | $D_{(Li^+)}$          | Slope          | $D_{(Li^+)}$          | Slope          | $D_{(Li^+)}$          |
| PTPEI   | 0.24  | $3.01 \times 10^{-7}$ | -0.16          | $2.45 \times 10^{-7}$ | -0.20          | $2.75 \times 10^{-7}$ |
| TFMA    | 0.18  | $2.60 \times 10^{-7}$ | -0.06          | $1.50 \times 10^{-7}$ | -0.11          | $2.03 \times 10^{-7}$ |
| Blank   | 0.09  | $1.84 \times 10^{-7}$ | -0.03          | $1.06 \times 10^{-7}$ | -0.05          | $1.37 \times 10^{-7}$ |

**Table. S3** Comparison of the performances of Li-S batteries with different electrolyte additive.

| <b>Additive and Dosages</b>                                 | <b>Electrolyte</b>                                       | <b>Capacity<br/>(mAh g<sup>-1</sup>)</b>                                                                  | <b>Capacity<br/>retention</b> | <b>Journal</b>              | <b>Reference</b> |
|-------------------------------------------------------------|----------------------------------------------------------|-----------------------------------------------------------------------------------------------------------|-------------------------------|-----------------------------|------------------|
| 1% phenyl-1-(4-trifluoromethyl)phenyl)ethan-1-imine (PTPEI) | 1 M LiTFSI                                               | 1190.9-645.9 (5.5 mg cm <sup>-2</sup> 0.1C 1 <sup>st</sup> -50 <sup>th</sup> )                            | <b>54.2%</b>                  | This work                   |                  |
|                                                             | DME/DOL(1:1 vol%) +1 wt% LiNO <sub>3</sub>               | 1214-981.2 (1.4 mg cm <sup>-2</sup> 0.1C 1 <sup>st</sup> -100 <sup>th</sup> )                             | <b>80.8%</b>                  |                             |                  |
|                                                             |                                                          | 1178.8-580 (1.4 mg cm <sup>-2</sup> 1C 1 <sup>st</sup> -200 <sup>th</sup> )                               | <b>49.2%</b>                  |                             |                  |
| lanthanum nitrate (La(NO <sub>3</sub> ) <sub>3</sub> )      | 1 M LiTFSI<br>DME/DOL(1:1 vol%) +2 wt% LiNO <sub>3</sub> | 912-553 (0.9 mg cm <sup>-2</sup> 0.2 C 10 <sup>th</sup> -100 <sup>th</sup> )                              | <b>64.2%</b>                  | ACS Appl. Mater. Interfaces | [1]              |
| 2% Thioacetamide (TAA)                                      | 1 M LiTFSI<br>DME/DOL(1:1 vol%) +2 wt% LiNO <sub>3</sub> | 1148.6-738.9 (1.2 mg cm <sup>-2</sup> 0.5 C 1 <sup>st</sup> -200 <sup>th</sup> )                          | <b>64.3%</b>                  | Electrochim. Acta           | [2]              |
| 2% Yttrium nitrate (Y(NO <sub>3</sub> ) <sub>3</sub> )      | 1 M LiTFSI<br>DME/DOL(1:1 vol%) +1 wt% LiNO <sub>3</sub> | 911.7-711.9 (1.2 mg cm <sup>-2</sup> - 1.5 mg cm <sup>-2</sup> 0.5 C 1 <sup>st</sup> -250 <sup>th</sup> ) | <b>78.1%</b>                  | ACS. Sustain. Chem. Eng     | [3]              |
| 0.1M Thiophene                                              | 1 M LiTFSI<br>DME/DOL(1:1                                | 1016-751.8 (3.6 mg cm <sup>-2</sup> 0.025 C 1 <sup>st</sup> -100 <sup>th</sup> )                          | <b>74%</b>                    | J. Power Sources            | [4]              |

|                                               |                                                                |                                                                                       |              |                           |     |
|-----------------------------------------------|----------------------------------------------------------------|---------------------------------------------------------------------------------------|--------------|---------------------------|-----|
|                                               | vol%) +2 wt%<br>LiNO <sub>3</sub>                              |                                                                                       |              |                           |     |
| <b>2%</b> 4,4-thiodibenzenethiol<br>(TBBT)    | 1 M LiTFSI<br>DME/DOL(1:1<br>vol%) +2 wt%<br>LiNO <sub>3</sub> | 994.4-752.7 (1-1.5 mg cm <sup>-2</sup> 0.5 C 1 <sup>st</sup> -<br>300 <sup>th</sup> ) | <b>75.6%</b> | Mater. Chem.<br>Front     | [5] |
| <b>0.05 M</b> Diphenyl Ditelluride<br>(DPDTe) | 1 M LiTFSI<br>DME/DOL(1:1<br>vol%) +2 wt%<br>LiNO <sub>3</sub> | 1142.2-640.4 (5 mg cm <sup>-2</sup> 0.1 C 1 <sup>st</sup> -100 <sup>th</sup> )        | <b>56%</b>   | Energy Environ.<br>Mater. | [6] |
| <b>0.1M</b> Diphenyl Diselenide<br>(DPDSe)    | 1 M LiTFSI<br>DME/DOL(1:1<br>vol%) +2 wt%<br>LiNO <sub>3</sub> | 924-765 (5 mg cm <sup>-2</sup> 0.1 C 1 <sup>st</sup> -55 <sup>th</sup> )              | <b>82%</b>   | Adv. Mater.               | [7] |

---

**Table. S4** The value of energy levels of FMOs for  $\text{Li}_2\text{S}_x$  - PTPEI,  $\text{Li}_2\text{S}_x$  - TFMA and  $\text{Li}_2\text{S}_x$  ( $x = 1, 2, 4, 6,$  and  $8$ ).

|                         | $\text{Li}_2\text{S}_x$ - PTPEI |       |            | $\text{Li}_2\text{S}_x$ - TFMA |       |            | $\text{Li}_2\text{S}_x$ |       |            |
|-------------------------|---------------------------------|-------|------------|--------------------------------|-------|------------|-------------------------|-------|------------|
|                         | LUMO                            | HOMO  | $\Delta E$ | LUMO                           | HOMO  | $\Delta E$ | LUMO                    | HOMO  | $\Delta E$ |
| $\text{Li}_2\text{S}$   | -0.08                           | -5.72 | 5.64       | 0                              | -5.65 | 5.65       | -0.08                   | -6.29 | 6.21       |
| $\text{Li}_2\text{S}_2$ | 0.04                            | -6.20 | 6.24       | 0.09                           | -6.72 | 6.81       | 0.02                    | -6.68 | 6.70       |
| $\text{Li}_2\text{S}_4$ | -0.04                           | -7.29 | 7.25       | 0.12                           | -7.51 | 7.63       | 0.01                    | -8.04 | 8.05       |
| $\text{Li}_2\text{S}_6$ | -0.34                           | -7.88 | 7.54       | -0.21                          | -7.80 | 7.69       | -0.56                   | -8.12 | 7.56       |
| $\text{Li}_2\text{S}_8$ | -0.42                           | -7.62 | 7.20       | -0.66                          | -7.87 | 7.21       | -0.89                   | -8.21 | 7.32       |

## References:

- [1] S. Liu, G. R. Li, X. P. Gao, *ACS Appl. Mater. Interfaces* 2016, 8, 7783-7789.
- [2] J. Li, L. He, F. Qin, J. Fang, B. Hong, Y. Lai, *Electrochimica Acta*, 2021, 376: 138041.
- [3] X. Hao, Y. Mao, T. Zhu, Y. Liu, T. Li, Y. Xiao, J. Zang, W. Wang, Y. Li, J. Ding, *ACS Sustainable Chemistry & Engineering*, 2024, 12(9): 3691-3701.
- [4] S. Lee, K. Sim, K. Y. Cho, S. Kim, K. S. Eom, *Journal of Power Sources*, 2023, 582: 233517.
- [5] C. Y. Shi, S. Y. Shao, C. X. Zong, J. H. Gu, Z. Y. Huang, Q. Y. Wang, B. Hong, M. R. Wang, Z. A. Zhang, J. Li, Y. Q. Lai, *Materials Chemistry Frontiers*, 2023, 7(1): 145-152.
- [6] W. Zhang, F. F. Ma, Q. Wu, Z. Q. Zeng, W. Zhong, S. J. Cheng, X. Chen, X. Jia, *Energy & Environmental Materials*, 2023, 6(3): e12369.
- [7] M. Zhao, X. Chen, X. Y. Li, B. Q. Li, J. Q. Huang, *Advanced Materials*, 2021, 33(13): 2007298.
